# Supplementary material for: Identification and expression analysis of calcium-dependent protein kinase family in oat (Avena sativa L.) and their functions in response to saline-alkali stresses
Source: Front Plant Sci. 2024 Oct 10;15:1395696. doi: 10.3389/fpls.2024.1395696 (PMC11499199; doi:10.3389/fpls.2024.1395696)
Supplement: Supplementary file 3 [file Table2.xlsx]

## Sheet: Table S5
Table S5. Expression data of AsCDPK genes under different salt treatments.
Gene ID	CK1	CK2	CK3	NS100-1	NS100-2	NS100-3	NS200-1	NS200-2	NS200-3	AS100-1	AS100-2	AS100-3	AS200-1	AS200-2	AS200-3	NAS100-1	NAS100-2	NAS100-3	NAS200-1	NAS200-2	NAS200-3
AsCDPK1	2.7041	2.6161	3.8347	3.757	3.6118	3.764	4.0331	3.2412	3.3035	2.646	2.9714	3.2144	2.5199	2.5195	3.5311	3.5316	4.2981	5.6285	2.6224	2.849	3.0874
AsCDPK2	15.9854	25.8364	24.0993	17.8136	23.355	24.0154	37.3859	22.0741	14.1974	36.9766	30.6061	31.1529	66.4315	61.2417	36.7823	38.6002	32.1251	33.5039	29.2452	30.6968	31.1455
AsCDPK3	296.004	298.252	269.856	130.079	208.642	187.248	105.177	121.811	71.143	320.713	272.931	254.079	197.543	173.694	54.2917	137.384	124.684	92.5012	55.359	57.3821	57.0623
AsCDPK4	2.3058	2.3106	3.9676	1.9732	3.663	2.958	1.1445	2.6579	1.4699	3.3935	2.4134	1.9112	1.0418	0.5536	0.3776	1.3621	1.4064	1.2553	0.3699	0.3427	0.3874
AsCDPK5	12.2539	20.8267	22.7305	16.371	19.1695	21.6963	20.8745	26.8563	19.5061	26.6824	28.8208	27.2435	37.4899	30.8725	18.5483	25.2617	28.747	25.0933	15.93	17.3249	16.561
AsCDPK6	0.4418	0.3455	0.8167	0.4259	0.348	0.3996	0.2811	0.3598	0.0963	0.3074	0.2143	0.3656	0	0	0.0357	0.1775	0.0247	0.036	0	0.0122	0.0118
AsCDPK7	293.112	275.679	247.266	123.097	200.767	177.657	81.6693	98.9136	65.3827	256.54	219.675	226.434	120.157	118.714	36.3452	82.3488	79.4874	67.1136	33.0332	35.974	33.8651
AsCDPK8	2.7172	1.7873	2.443	2.6007	2.0985	4.2266	4.806	1.4526	2.0697	1.4546	1.9127	2.3641	3.9745	1.4673	2.2663	4.1068	1.5453	2.5543	3.1296	4.3552	4.244
AsCDPK9	3.6659	5.4267	8.9401	3.8119	5.0226	6.3937	9.682	12.7656	8.1854	8.2279	11.7662	12.8656	17.439	16.5138	10.5612	9.4263	13.2985	9.8686	7.6568	7.8936	7.8691
AsCDPK10	1.4872	1.8869	2.4435	2.3866	3.3786	2.6693	2.0018	1.9657	1.6696	2.7863	1.8319	1.6962	1.2508	0.8968	0.8413	2.2966	1.7863	1.7173	1.017	1.2521	0.9425
AsCDPK11	157.098	139.082	133.453	65.1284	101.41	93.5266	40.5723	50.7582	35.4242	142.442	123.556	128.39	62.722	59.7268	15.9354	40.0234	41.4944	36.1669	15.9475	14.9627	16.9127
AsCDPK12	6.3304	8.1589	7.3088	12.3268	14.2636	9.4969	10.5519	11.3045	10.802	16.4145	10.9385	9.0431	11.9476	10.2428	4.3242	14.2665	8.8697	10.6285	3.9195	3.6259	3.9126
AsCDPK13	5.7462	3.1344	0.4437	5.2401	4.6963	4.6823	16.582	1.2147	1.8777	4.1556	0.5568	0.2857	12.7408	4.9714	4.3281	14.669	1.5195	0.8031	22.9451	19.901	20.7448
AsCDPK14	0.9824	0.7725	3.0016	2.4838	2.6075	2.4367	1.6614	2.7141	2.6835	1.421	2.5953	2.8219	1.2529	1.6891	2.2799	1.7378	2.8335	3.6969	1.1587	1.3357	1.8837
AsCDPK15	1.4179	1.7246	4.1096	1.7359	2.5212	2.3274	1.1403	2.4815	1.7657	2.4647	2.0491	2.3605	0.5873	0.4731	0.3386	1.5613	1.1794	1.3386	0.4952	0.3457	0.536
AsCDPK16	4.9001	2.826	2.0849	3.5957	3.3688	3.7848	11.3024	6.3412	7.8169	3.2551	3.8261	2.7853	9.4231	18.6223	13.6145	7.1839	6.7748	3.9335	15.3444	11.7262	12.7165
AsCDPK17	10.1298	11.0067	10.054	17.2308	19.8315	13.4117	20.1556	15.0779	14.344	20.9253	14.183	13.0271	18.8626	11.1584	9.8701	21.3173	9.8059	13.8426	17.333	17.5899	17.2022
AsCDPK18	4.3065	2.0749	1.8874	2.5859	2.8878	3.4938	11.1315	7.5091	8.7519	3.2263	3.4455	2.4383	8.1293	19.2932	18.5012	7.7133	8.8713	6.1656	16.7061	15.3512	15.764
AsCDPK19	0.2282	0.3956	0.34	0.3751	0.4495	0.3711	0.3961	0.6133	0.3688	0.471	0.4426	0.5857	0.8115	0.1172	0.0503	0.2627	0.2479	0.4062	0.0587	0.0899	0.0996
AsCDPK20	11.1596	11.45	9.457	18.6619	17.9344	13.1613	15.1479	17.4552	18.8926	19.0054	15.0198	13.1051	12.7319	14.2306	7.3949	17.7623	12.0295	15.552	5.8894	6.2848	6.0022
AsCDPK21	87.5165	99.0193	91.1441	83.0042	85.7326	82.034	44.7306	58.8281	47.8958	108.406	106.495	102.921	118.518	85.117	54.8319	71.323	73.3013	71.6014	45.8494	43.7116	41.843
AsCDPK22	16.1306	21.6274	9.4817	15.8048	17.1819	15.9822	7.5119	6.4149	5.3515	22.6409	11.3528	14.0183	18.307	6.6319	2.4369	10.9865	6.0585	7.0639	3.2575	3.2094	3.1307
AsCDPK23	19.7026	13.0431	16.4754	18.3956	15.5917	20.6344	26.4024	23.28	21.7587	13.9706	16.2617	24.333	21.0677	14.5343	13.5646	22.7713	16.0957	22.9355	12.2304	15.569	13.5877
AsCDPK24	3.9976	4.1075	5.8772	3.1302	4.7364	3.7612	1.5822	2.9132	2.4015	5.9952	8.2132	8.0391	3.7896	3.1923	1.3979	2.5646	3.9796	3.1014	0.6858	0.999	0.7872
AsCDPK25	0.0411	0.1307	0.0259	0.0868	0.2701	0.0507	0.0393	0.0608	0	0.2093	0.0306	0.0124	0.1387	0	0.0125	0	0	0	0	0	0
AsCDPK26	32.4745	34.2381	38.3705	41.7503	35.2198	42.8632	39.9944	33.6572	35.9824	34.0945	36.5139	40.2521	38.2201	24.4541	19.5665	34.2695	26.4696	31.8073	19.4394	24.9356	22.477
AsCDPK27	0.0112	0	0.0141	0	0.0295	0.0277	0.0214	0.0265	0.0138	0	0	0.0135	0	0.0158	0.0272	0.0676	0	0.0137	0.0529	0.0417	0.0135
AsCDPK28	36.8815	42.2587	59.7226	31.3109	37.0219	36.7152	17.1815	32.1067	30.2927	49.7826	67.5632	62.4259	41.7874	42.598	17.5078	22.584	34.2542	32.728	6.6591	6.8622	6.5303
AsCDPK29	18.0743	18.1266	23.4131	27.0046	21.9053	23.2321	27.107	23.3185	27.734	20.5479	23.8541	30.9444	26.4261	25.3737	22.0325	22.418	25.2835	23.812	20.9679	24.3081	22.4074
AsCDPK30	23.7297	24.5337	32.6486	18.3658	26.1309	20.1901	9.6542	15.4487	11.3017	32.4405	46.4393	40.0098	24.2329	18.6771	7.5873	14.3106	19.1917	16.7259	4.5501	5.4041	4.7799
AsCDPK31	7.1598	7.499	10.4862	10.0735	11.4115	8.5651	6.7874	7.8722	6.574	8.7033	6.4209	7.999	2.7684	1.9836	1.12	6.1096	3.656	4.8302	1.594	2.0314	1.7562
AsCDPK32	3.8324	4.6392	5.3778	6.6235	6.8352	6.7341	5.0386	5.5351	5.0639	6.0568	6.1423	5.8523	3.8521	3.3829	2.0176	5.4919	4.4218	5.2856	1.7569	2.3732	2.5057
AsCDPK33	4.5012	4.1196	4.1347	3.5205	4.3378	3.6473	1.9197	1.5143	1.2621	5.2292	3.5747	3.1637	0.7265	0.4227	0.305	2.0061	1.1141	1.4645	0.3728	0.6375	0.4885
AsCDPK34	5.9538	8.3818	6.2683	8.8177	8.8798	7.6143	11.5391	10.9128	9.9266	8.382	7.4943	6.5685	5.7814	7.0634	10.6553	8.1424	9.2487	8.5658	7.9461	7.7161	7.5796
AsCDPK35	26.5993	22.7517	15.6658	28.6043	30.0928	29.8064	31.2642	11.6116	7.0772	40.7037	33.0203	23.6454	36.4957	38.1759	24.3298	28.672	25.9774	25.5035	33.7335	29.0835	29.7807
AsCDPK36	4.6415	3.3057	5.1116	3.5641	4.3738	3.586	1.9175	2.3011	2.2944	5.1963	4.5676	4.9311	1.1106	0.4053	0.2422	1.7449	1.0199	1.7096	0.3061	0.3091	0.3594
AsCDPK37	12.2404	12.0074	9.2945	14.8029	12.6022	12.6228	21.4322	19.5976	14.3684	11.0719	19.4478	10.2065	14.166	12.9253	14.5721	13.9918	13.3403	10.7127	16.7019	11.18	13.8784
AsCDPK38	4.2161	5.0187	5.7594	7.4734	7.4807	7.3766	5.641	5.5787	5.0389	6.5733	4.2877	5.2236	5.5672	2.1427	0.7811	5.7527	2.9063	3.6365	1.3483	2.0428	1.6619
AsCDPK39	3.4732	2.1266	6.6051	3.2011	3.3292	3.8543	1.5487	3.5804	2.593	3.4621	4.7571	6.4387	1.1022	0.8487	0.5832	2.1153	1.5718	2.8376	0.8505	0.64	0.6057
AsCDPK40	11.3388	10.8199	15.6075	11.7288	11.721	11.1597	13.4981	21.5455	15.8579	21.8676	30.0401	18.2394	15.3949	17.4868	12.0562	12.5698	22.0864	7.9856	15.2906	10.2097	12.9689
AsCDPK41	1.6843	2.6586	1.4352	2.0074	1.6307	1.1839	1.2485	1.3015	1.0382	2.8728	1.8297	1.5147	2.8934	3.4819	3.4018	1.1344	1.4319	0.6216	2.2641	2.3308	2.4053
AsCDPK42	12.6634	9.1317	7.3557	10.9403	19.7911	15.1331	8.2971	4.096	3.937	25.4255	10.6434	7.7399	7.9109	5.1509	3.3061	12.1522	6.2811	6.42	3.0303	2.5973	2.8814
AsCDPK43	45.7114	34.2583	43.7458	30.9327	34.3868	35.4601	28.2284	17.269	13.58	4.4526	40.4065	42.6436	39.7096	32.8908	17.2507	26.8647	21.997	14.1724	16.5702	17.3772	16.9335
AsCDPK44	33.3376	54.6756	65.265	41.1714	49.5436	49.0044	16.313	22.1482	14.2345	60.1832	52.7205	55.2208	29.342	38.8565	18.7738	21.0329	29.5786	19.0775	11.779	15.0801	13.0547
AsCDPK45	36.2579	32.6246	33.1901	38.0834	39.3695	44.3245	38.7292	43.3318	36.0044	49.0586	52.4529	37.811	39.8825	43.7969	29.9145	52.1385	78.6985	48.9559	36.5359	31.0416	32.6194
AsCDPK46	0.0909	0.3199	0.2291	0.2738	0.2983	0.3363	0.0868	0.1397	0.0334	0.3273	0.0992	0.0873	0.5761	0.5648	0.3308	0.0657	0.1029	0.1557	0.0772	0.1576	0.0763
AsCDPK47	30.8252	45.2314	64.1474	32.8703	42.1051	21.6065	16.5981	20.6325	14.7498	77.9107	68.8599	65.2058	25.745	37.0182	15.8941	15.371	28.3844	21.0875	10.8708	10.7483	10.9992
AsCDPK48	4.2215	13.5787	2.9383	13.8141	12.6361	4.2268	6.7058	6.8321	5.2412	10.5448	4.3372	3.8969	7.4899	7.3731	7.7799	6.3066	6.3358	4.2447	7.5209	8.3948	7.3737
AsCDPK49	2.4919	4.6332	3.7922	3.7351	3.4976	2.9285	2.2748	4.8742	3.4992	6.072	6.0679	4.0057	4.7173	11.8636	6.7497	3.2882	6.0512	3.8578	3.0781	2.7945	3.3602
AsCDPK50	0.0449	0.0439	0.0566	0.0135	0.0737	0.0277	0.0322	0.0531	0.0275	0.1407	0.0223	0.0675	0.0455	0.0159	0	0.149	0.0141	0.0275	0	0	0.0135
AsCDPK51	23.7051	40.2465	53.314	17.0875	30.9513	35.4575	14.7125	22.2453	18.3374	40.1175	44.6254	50.7409	35.2011	27.2337	10.375	19.9798	22.6417	27.184	8.6015	8.3769	7.8958
AsCDPK52	0.0553	0.0541	0.0419	0	0.0436	0.0819	0.0634	0.0523	0.0271	0	0.0878	0.1064	0	0	0	0.0267	0.0418	0.0542	0.0104	0	0.0266
AsCDPK53	0.0587	0.1608	1.1552	0.2549	0.216	0.1739	0.1122	0.8473	1.2531	0.1472	0.9325	0.9033	0.0951	0.2157	0.3563	0.1133	0.6354	1.078	0.0111	0.0291	0.0423
AsCDPK54	0.6298	0.9488	0.3384	0.8711	1.0844	0.7387	0.4336	0.3418	1.1139	1.0184	0.4917	0.4589	0.4456	0.4812	0.0877	0.585	0.7661	0.3537	0.2241	0.2813	0.2354
AsCDPK55	41.047	74.3426	87.9318	27.5274	51.3118	58.1489	17.7263	32.7421	24.3885	66.3706	64.8303	83.7313	27.6795	24.0722	6.189	25.0384	22.9786	27.6675	5.69	4.5074	4.739
AsCDPK56	28.5744	51.6287	58.4646	19.1473	34.1974	36.0621	17.5052	24.5039	18.234	54.1189	52.0414	56.342	29.4928	21.0216	8.3818	20.1805	21.8698	23.9878	5.5032	4.0408	4.8111
AsCDPK57	1.0172	1.726	1.2822	2.2406	2.1337	2.0047	1.4397	0.7464	1.161	1.739	1.0903	1.0815	0.883	0.2147	0.3404	1.8324	0.6617	1.0728	0.4744	0.362	0.4209
AsCDPK58	0.2102	0.4624	0.2429	0.2956	0.2913	0.2737	0.3958	0.6489	0.2076	0.2194	0.2781	0.3578	0.1733	0.2062	0.255	0.2042	0.213	0.3215	0.0606	0.0217	0.0981
AsCDPK59	0.4633	0.6385	0.38	0.619	0.5643	0.5371	0.8473	1.3463	0.5543	0.5506	0.576	0.4225	0.271	0.134	0.4808	0.572	0.2527	0.5464	0.374	0.2627	0.4154
AsCDPK60	0.0435	0.0106	0.0822	0.131	0.0999	0.0805	0.2802	0.7069	0.4665	0.2553	0.2373	0.2612	0.2493	0.3685	0.2902	0.5505	0.2871	0.4389	0.0513	0.0808	0.0261
